# Supplementary material
Source: PubMed Central journal article supplement (PMC164444)

### Koch's 1990 Aerosols: Annual Mean at 550 nm

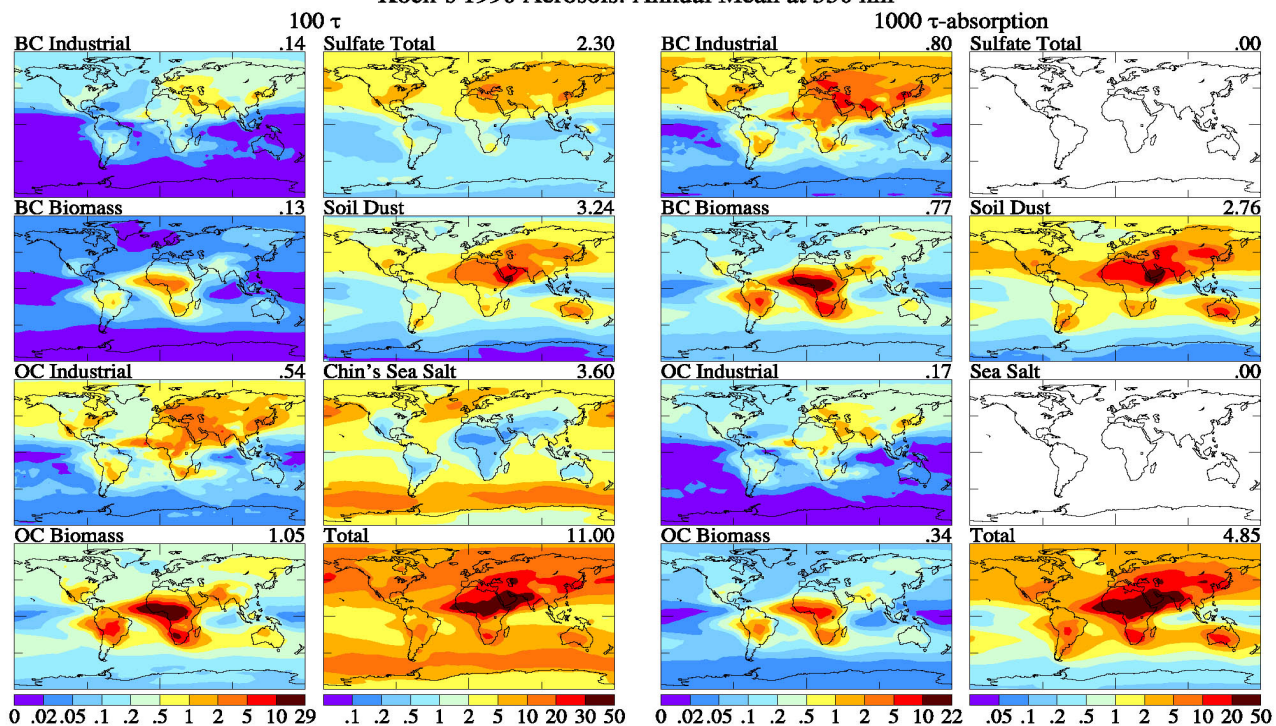

### Chin's 2000 Aerosols: Annual Mean at 550 nm

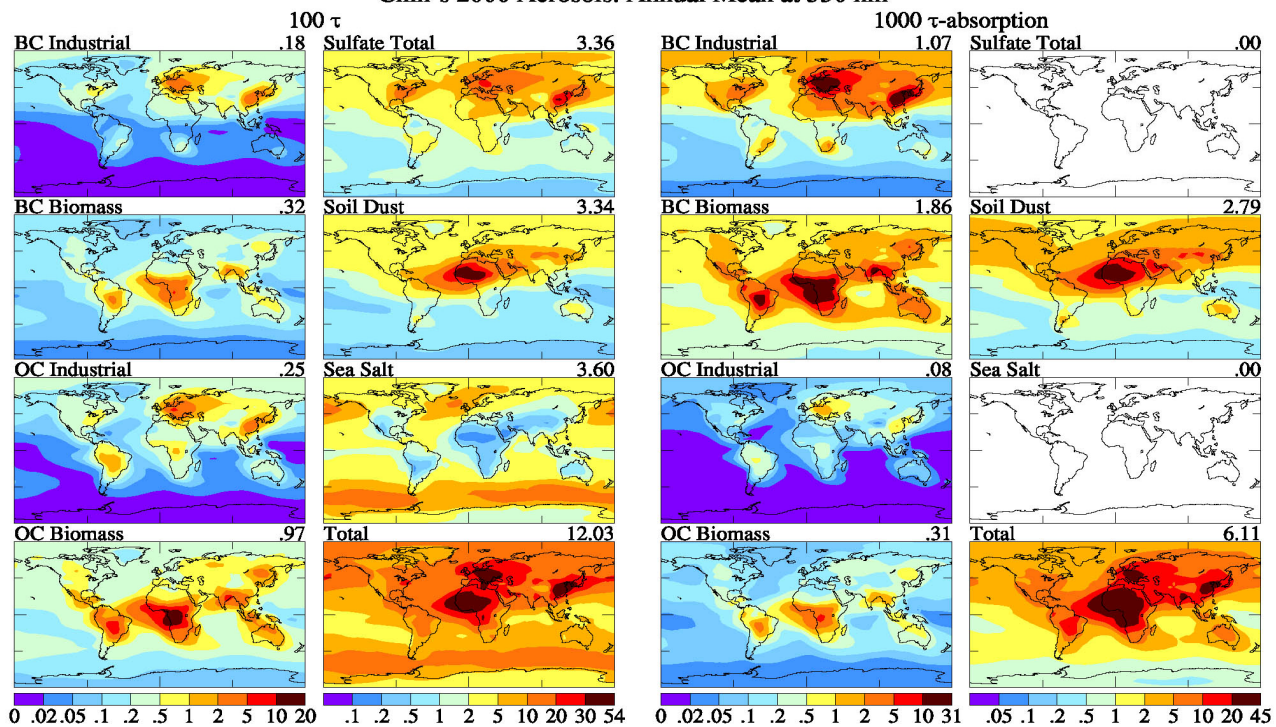

Supplement: pnas_0731897100_2.pdf [file pnas_0731897100_2.pdf]
